# Supplementary material for: A passivation strategy assisting a robust and low consumption power BP-based optical synaptic device for neural computing
Source: Royal Society of Chemistry journal article supplement (doi:10.1039/d3tc04645a), 2024-01-01
Supplement: d3tc04645a1.pdf [file d3tc04645a1.pdf]

## **Electronic Supplementary information**

# **Passivation Strategy Assisting Robust and Low Consumption Power BP-based Optical Synaptic Device for Neural Computing**

Jiahao Zeng<sup>a</sup>, Liping Ding<sup>\*a</sup>, Shuai Yuan<sup>a</sup>, Zhe Feng<sup>b</sup>, Liyan Dong<sup>a</sup>, Weikang Shen<sup>a</sup>, Pan Wang<sup>a</sup>, Zuheng Wu<sup>b</sup>, and Guodong Wei<sup>a</sup>

<sup>a</sup> *Institute of Electronic Information and Artificial Intelligence, Shaanxi University of Science and Technology, Xi'an 710021, Shaanxi, P.R. China.*

<sup>b</sup> *School of Integrated Circuits, Anhui University, Hefei 230601, Anhui, P.R. China.*

*\*Corresponding Author: [scu\\_ding@163.com](mailto:scu_ding@163.com)*

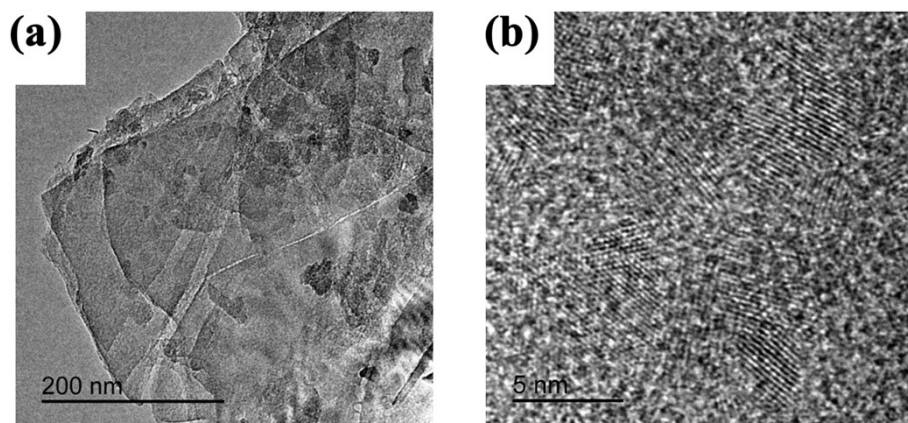

**Fig. S1** (a) The TEM image of the original black phosphorus nanosheets. (b) The TEM image of graphene oxide quantum dot material.

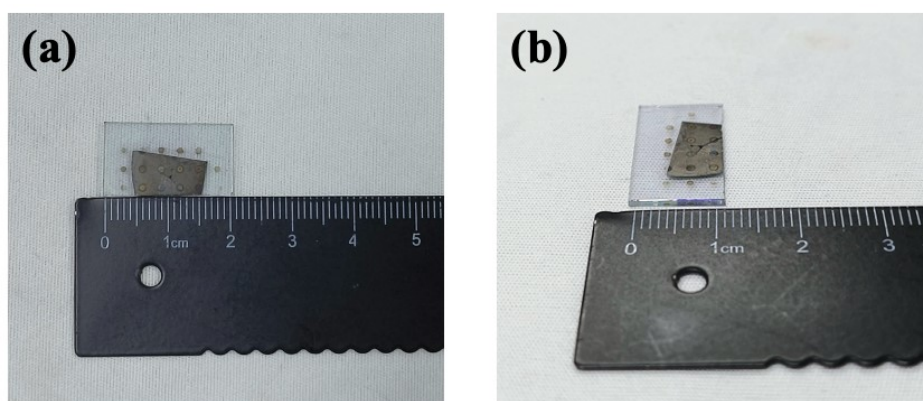

**Fig.S2** Stored at room temperature for over thirty months, the synaptic devices of BP-GOQDs are shown in (a) top view and (b) side view.

**Table S1** Comparison of response time, memory characteristics and stability of artificial synapse devices.

| Artificial synapse device                                 | Synaptic behavior | Response time (s)    | paired-pulse facilitation | Logical operation | Stability         |
|-----------------------------------------------------------|-------------------|----------------------|---------------------------|-------------------|-------------------|
| MgO-GOQDs <sup>1</sup>                                    | Yes               | $2.2 \times 10^{-3}$ | 144.2%                    | No                | /                 |
| N-GOQDs <sup>2</sup>                                      | Yes               | $1.6 \times 10^{-3}$ | 67.3%                     | No                | /                 |
| Ti <sub>3</sub> C <sub>2</sub> -MXene <sup>3</sup>        | Yes               | 3.92                 | 132.1%                    | Yes               | /                 |
| BP-SnSe junction synaptic device <sup>4</sup>             | Yes               | 1.76                 | /                         | No                | /                 |
| BP based floating gate synaptic <sup>5</sup>              | Yes               | /                    | /                         | No                | /                 |
| Cr-Ti-OSC nanoscopic vertical transistor <sup>6</sup>     | Yes               | 9.74                 | 158.7%                    | No                | /                 |
| HfSe <sub>2-x</sub> O <sub>x</sub> memristor <sup>7</sup> | Yes               | 4.08                 | /                         | Yes               | 10 <sup>4</sup> s |
| MoS <sub>2</sub> -SiO <sub>2</sub> memristor <sup>8</sup> | Yes               | 1.09                 | 108.5%                    | No                | /                 |
| This work                                                 | Yes               | 3.15                 | 168.7%                    | Yes               | 30 months         |

## Ref.

- 1 T. Chen, S. Yang, J. Wang, W. Chen, L. Liu, Y. Wang, S. Cheng and X. Zhao, *Adv Elect Materials*, 2021, **7**, 2000882.
- 2 A. S. Sokolov, M. Ali, R. Riaz, Y. Abbas, M. J. Ko and C. Choi, *Adv Funct Materials*, 2019, **29**, 1807504.
- 3 H. Wei, H. Yu, J. Gong, M. Ma, H. Han, Y. Ni, S. Zhang and W. Xu, *Adv Funct Materials*, 2021, **31**, 2007232.
- 4 H. Tian, X. Cao, Y. Xie, X. Yan, A. Kostelec, D. DiMarzio, C. Chang, L.-D. Zhao, W. Wu, J. Tice, J. J. Cha, J. Guo and H. Wang, *ACS Nano*, 2017, **11**, 7156–7163.
- 5 X. Xiong, X. Wang, Q. Hu, X. Li and Y. Wu, *iScience*, 2022, **25**, 103947.
- 6 J. Lenz, F. Del Giudice, F. R. Geisenhof, F. Winterer and R. T. Weitz, *Nat. Nanotechnol.*, 2019, **14**, 579–585.
- 7 L. Yin, R. Cheng, Z. Wang, F. Wang, M. G. Sendeku, Y. Wen, X. Zhan and J. He, *Nano Lett.*, 2020, **20**, 4144–4152.
- 8 L. Bao, J. Zhu, Z. Yu, R. Jia, Q. Cai, Z. Wang, L. Xu, Y. Wu, Y. Yang, Y. Cai and R. Huang, *ACS Appl. Mater. Interfaces*, 2019, **11**, 41482–41489.
